# Supplementary material for: Bioenergetic modulation with the mitochondria uncouplers SR4 and niclosamide prevents proliferation and growth of treatment-naïve and vemurafenib-resistant melanomas
Source: PubMed Central journal article supplement (PMC6319337; doi:10.18632/oncotarget.26421), 2018-12-11
Supplement: oncotarget-09-36945-s001.pdf [file oncotarget-09-36945-s001.pdf]

## Bioenergetic modulation with the mitochondria uncouplers SR4 and niclosamide prevents proliferation and growth of treatment-naïve and vemurafenib-resistant melanomas

### SUPPLEMENTARY MATERIALS

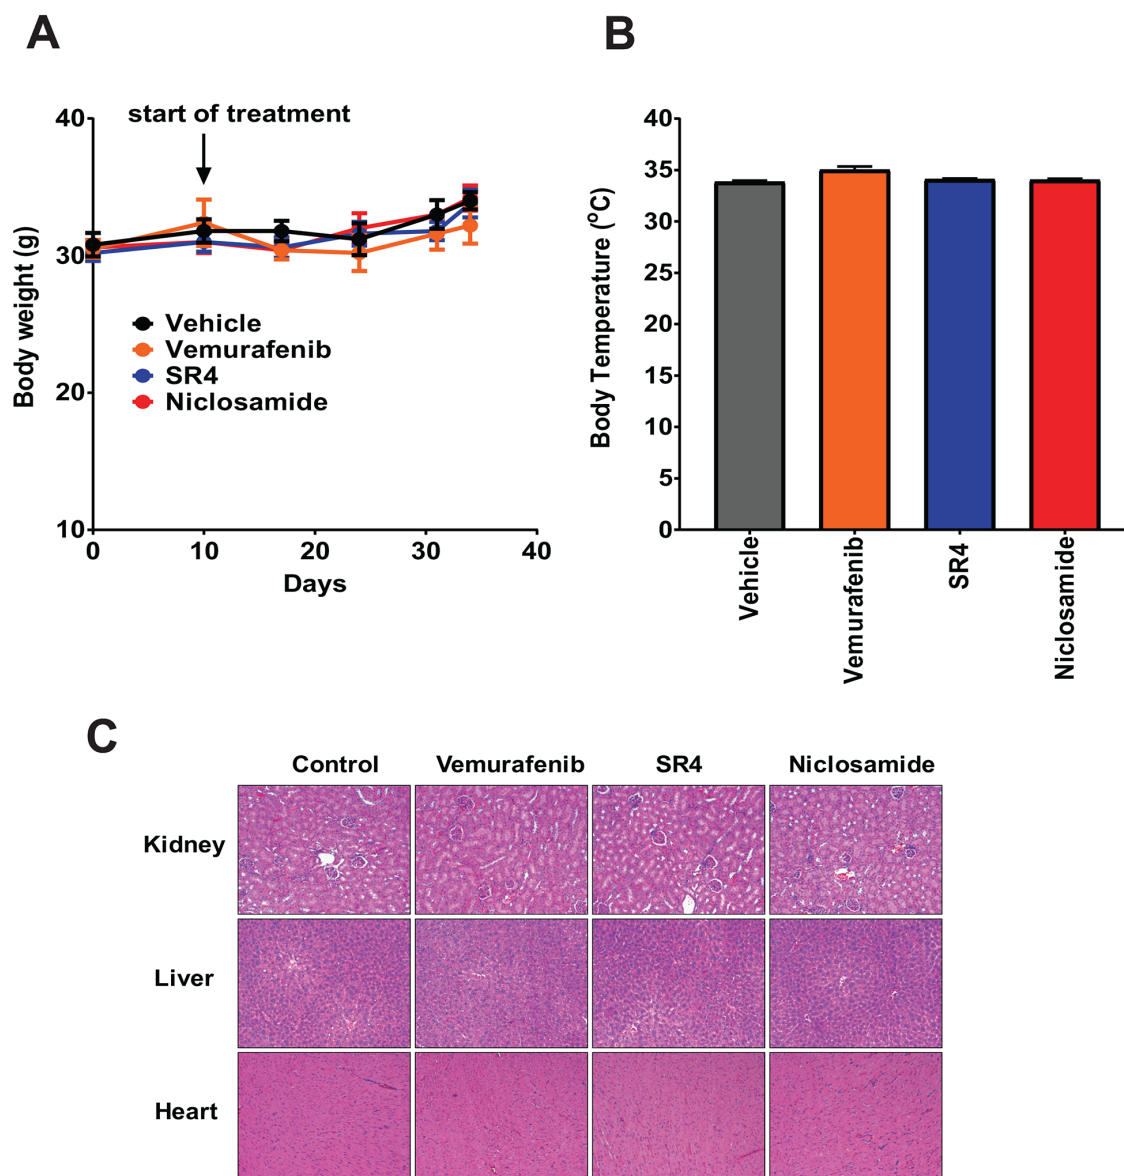

**Supplementary Figure 1: Effects of SR4, niclosamide and vemurafenib on body weight, body temperature and key organs of nude mice bearing the A375 xenograft. (A)** Body weights of mice during treatment of test compounds each administered orally at 10 mg/kg/day. Data are means  $\pm$  SEM (n=6). **(B)** Body temperature of mice after 4 hr treatment of test compounds (10 mg/kg/day, p.o). Data are means  $\pm$  SEM (n=6). **(C)** Representative H&E staining of kidney, heart and liver sections from xenograft mice in each treatment group.

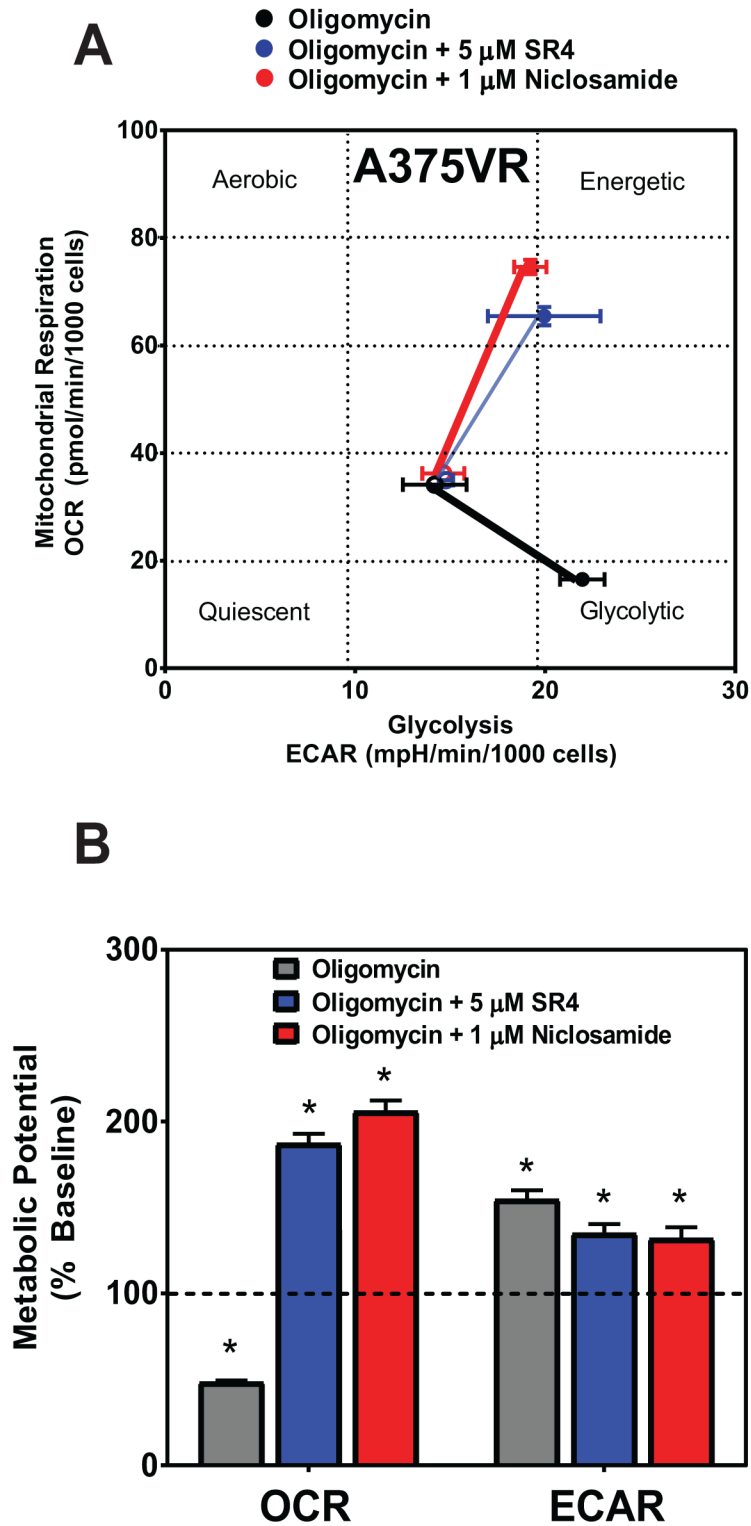

**Supplementary Figure 2: SR4 and niclosamide increase metabolic potential in vemurafenib-resistant melanoma.** (A) Metabolic phenogram analysis of OCR and ECAR by Seahorse Cell Energy Phenotype test. A375VR cells were treated with 1  $\mu$ M oligomycin with or without SR4 (5  $\mu$ M) or niclosamide (1  $\mu$ M) and the change in metabolic phenotype was assessed after 1 h treatment. (B) Metabolic OCR and ECAR potential of A375VR cells treated with oligomycin alone or oligomycin + SR4 or niclosamide as determined from the Cell Energy Phenotype test. Data in all three figures are means from 6-8 wells  $\pm$  SEM, and are representative rates of 2 separate experiments. \* $P < 0.05$  vs. baseline levels.

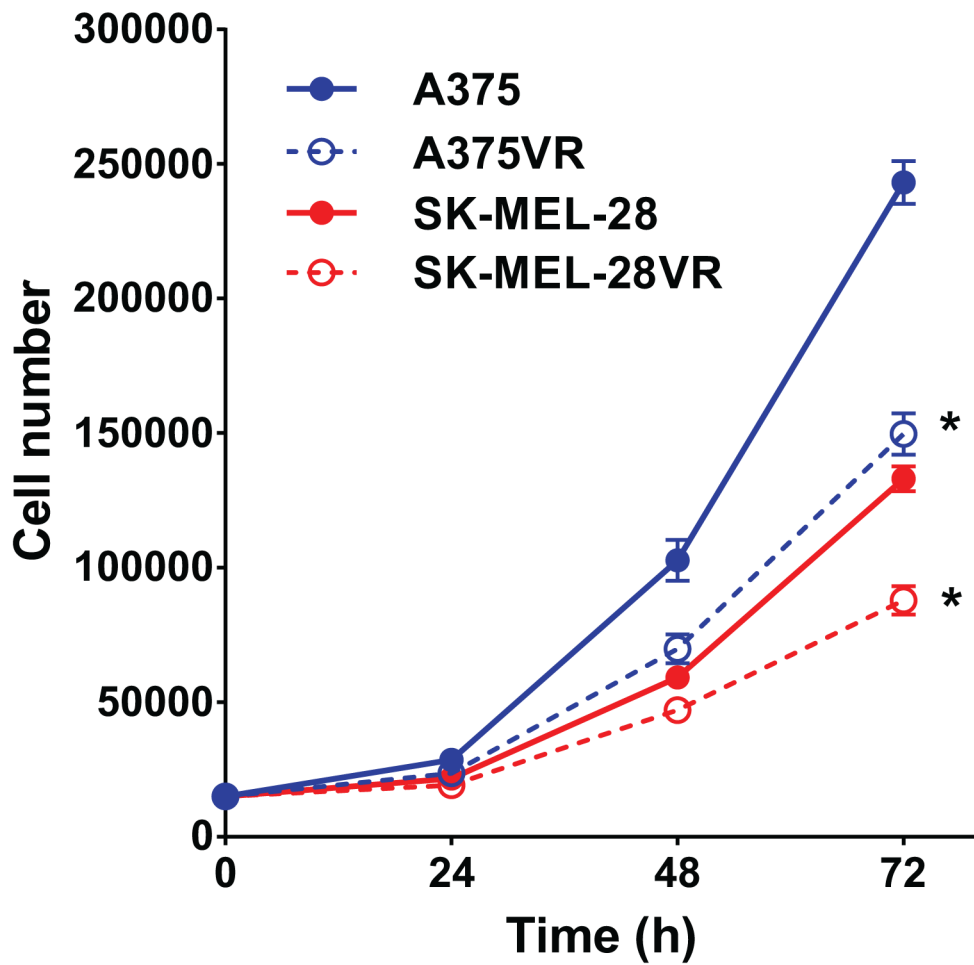

**Supplementary Figure 3: Cell growth comparison between parental and vemurafenib-resistant melanoma cell lines.** Each cell line was plated at 15,000 cells/well at time=0. After 24, 48, and 72 h of incubation, the cell number in each well was measured using an automated cell counter (Coulter Z1, Beckman Coulter, Brea, CA). Data are means  $\pm$  SEM from three replicates per time point. \* $P < 0.05$  vs. parental cell.

**Supplementary Table 1: Comparison of growth inhibition ( $GI_{50}$ ) data of niclosamide and SR4 from the NCI-DTP60 panel screening. Highlighted in *yellow* are the melanoma cell lines. In all cell panels, niclosamide had lower  $GI_{50}$  than SR4, except in the two colon cancer lines highlighted in *green*.**

See Supplementary File 1
